# Supplementary material for: Metal carboxylate-phosphonates containing flexible N-donor co-ligands
Source: Royal Society of Chemistry journal article supplement (doi:10.1039/b927100g), 2010-01-01
Supplement: b927100g.pdf [file b927100g.pdf]

## Supporting Information

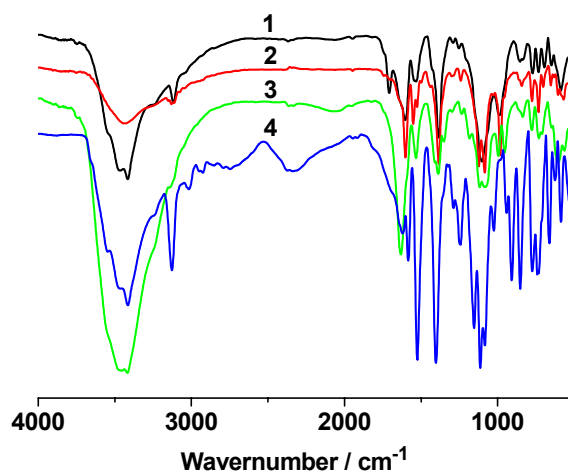

Figure S1. IR spectra for compounds 1–4.

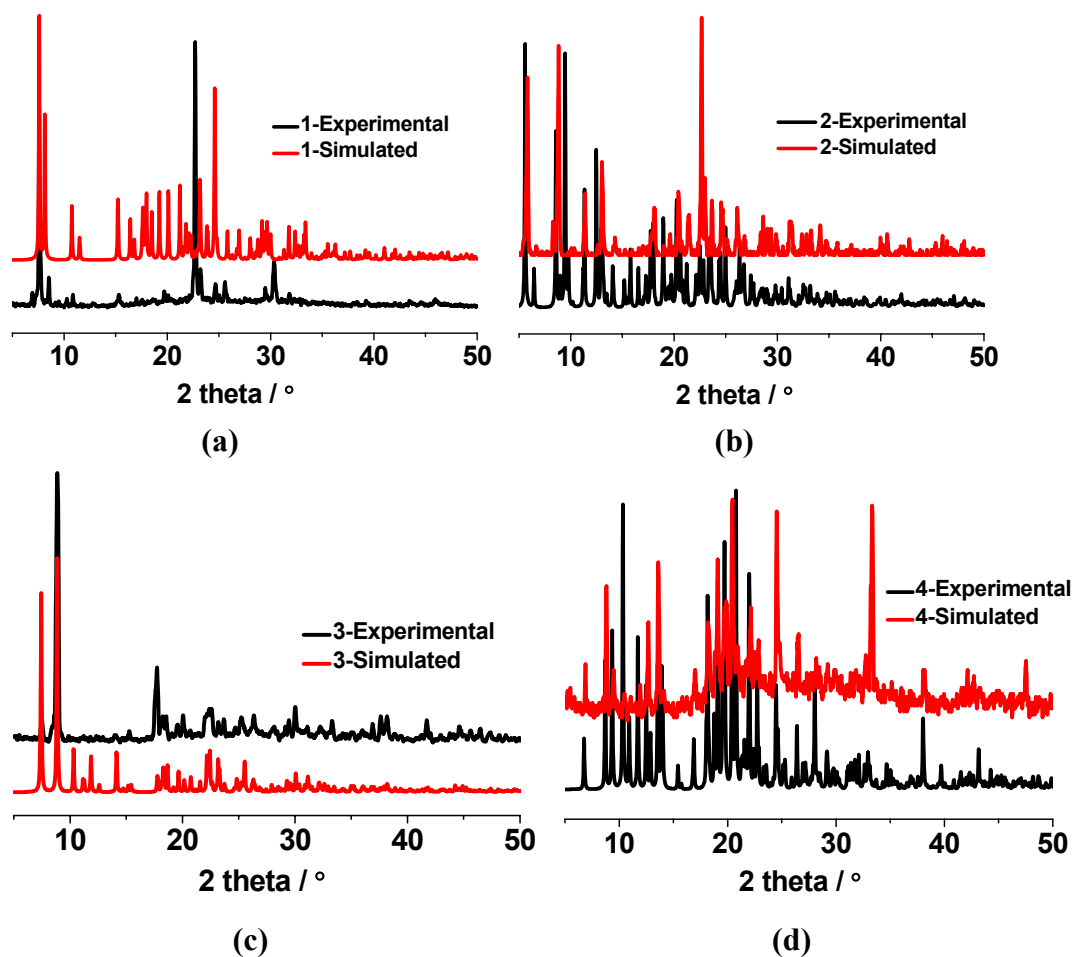

Figure S2. XRD patterns for compounds 1–4.

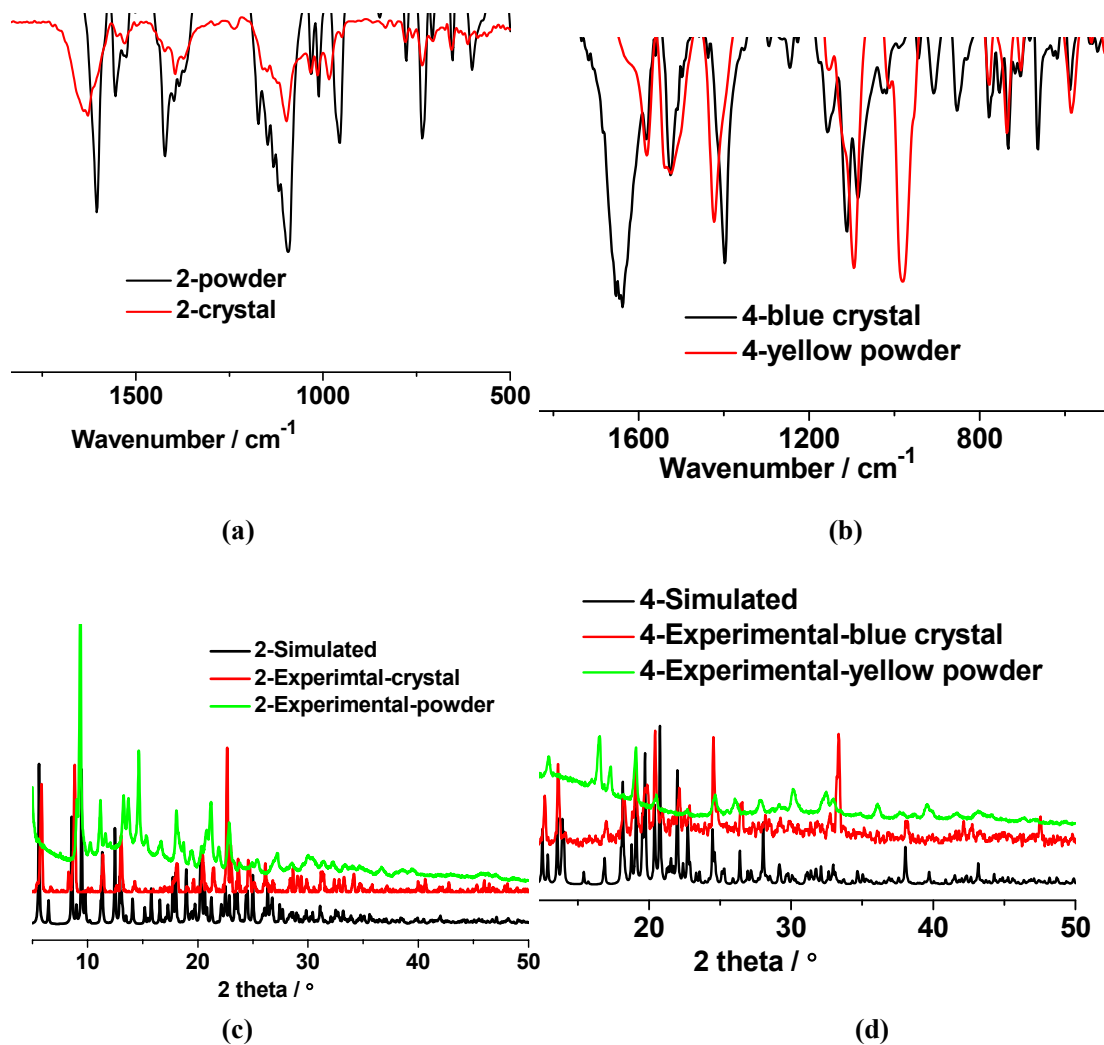

**Figure S3.** IR spectra and XRD patterns for the crystalline and powder phases in compounds 2 and 4.

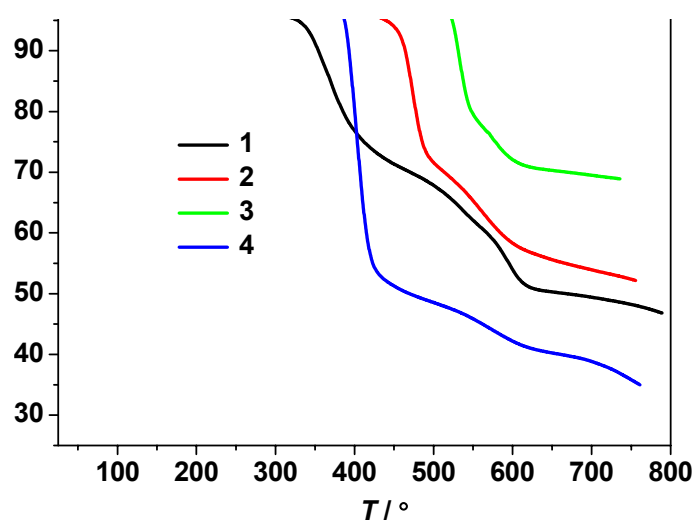

**Figure S4.** TGA curves for compounds 1-4.

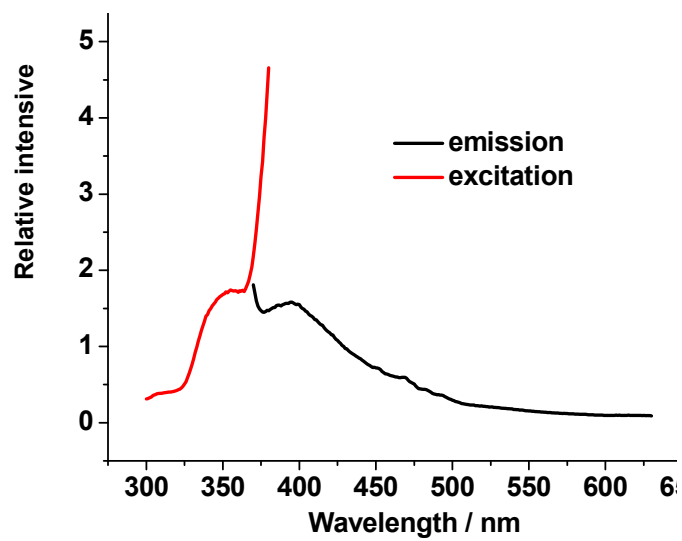

**Figure S5.** The excitation and emission spectra of L<sup>3</sup> in the solid state at room temperature.
